# Supplementary material
Source: Research Square preprint supplement (doi:10.21203/rs.3.rs-9486116/v1)
Supplement: Supplementary file 1 [file 424ff24c0efa0e88fa5c4ce5.docx]

**Supplementary Figures**

**
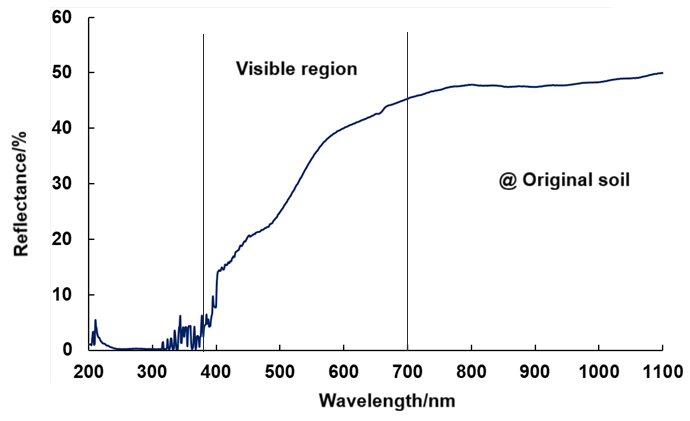
**

**Fig.S1a** Reflectance spectrum of the original soil.


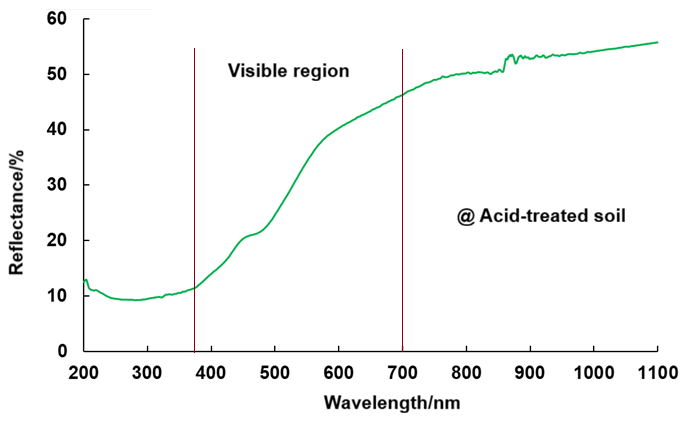


**Fig.S1b** Reflectance spectrum of acid-treated soil.


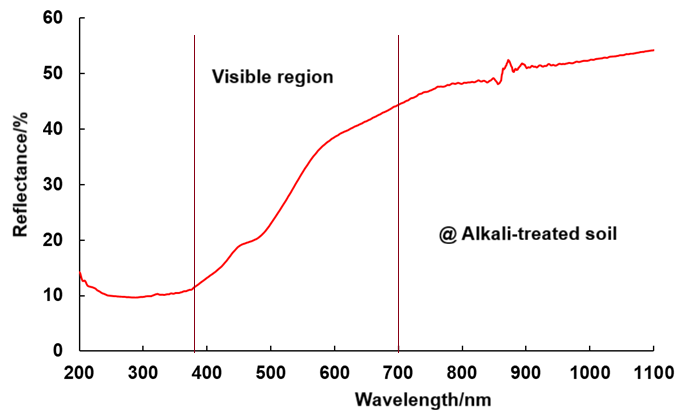


**Fig.S1c** Reflectance spectrum of alkali-treated soil.


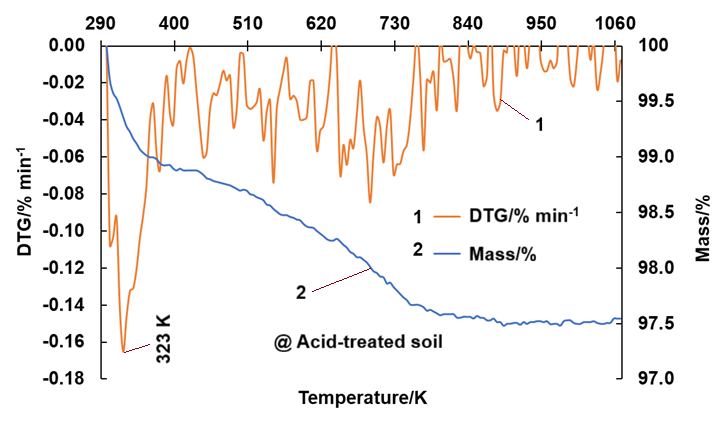


**Fig.S2a** TG-DTG curve of the acid-treated soil


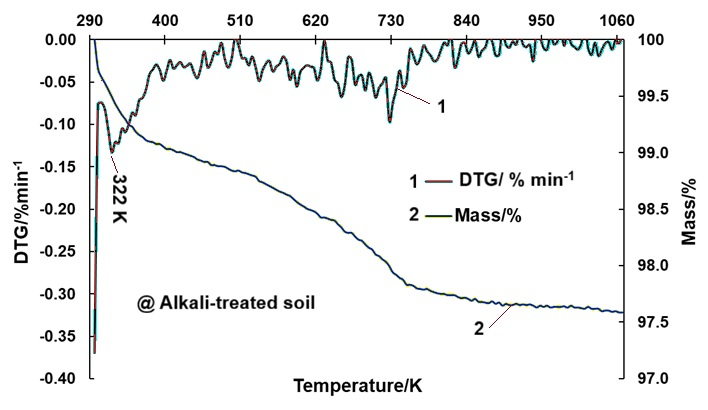


**Fig.S2b** TG-DTG curve of the alkali-treated soil


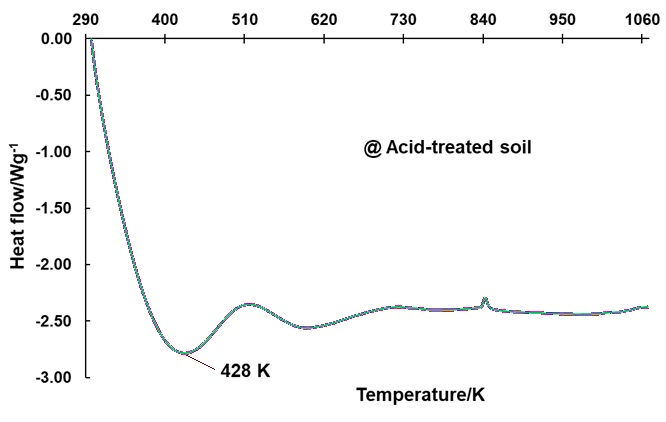


**Fig.S2c** DSC curve of the acid-treated soil


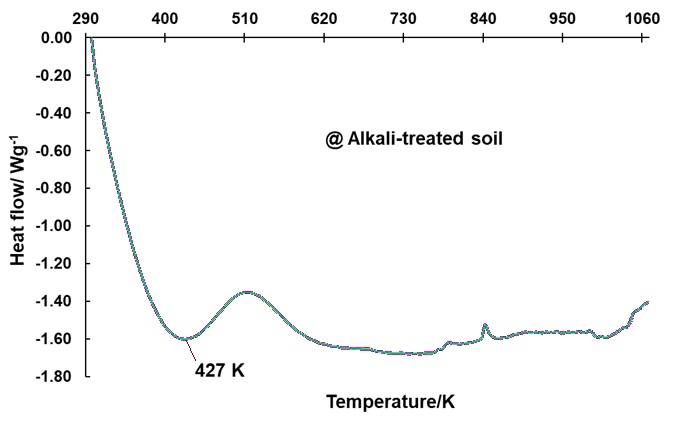


**Fig.S2d** DSC curve of the alkali-treated soil.


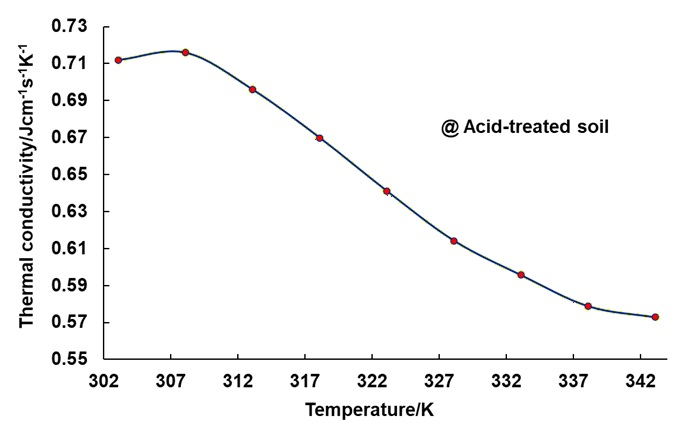


**Fig.S2e** Thermal conductivity graph of the acid-treated soil


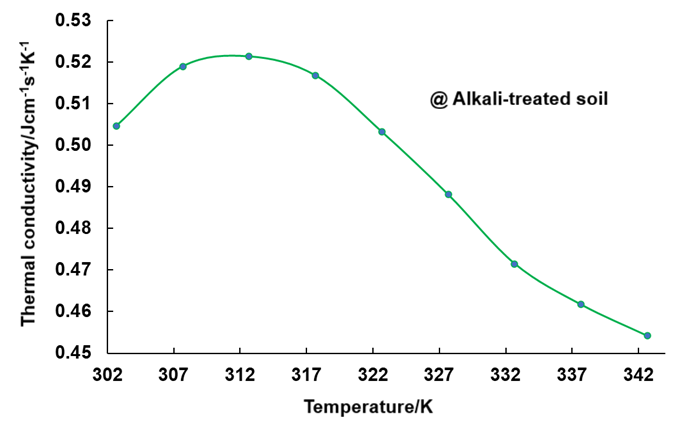


**Fig.S2f** Thermal conductivity graph of the alkali-treated soil


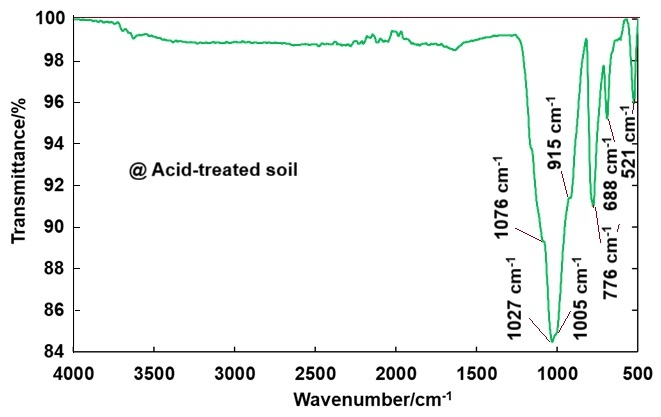


**Fig.S3a** ATR-IR spectrum of acid-treated soil.


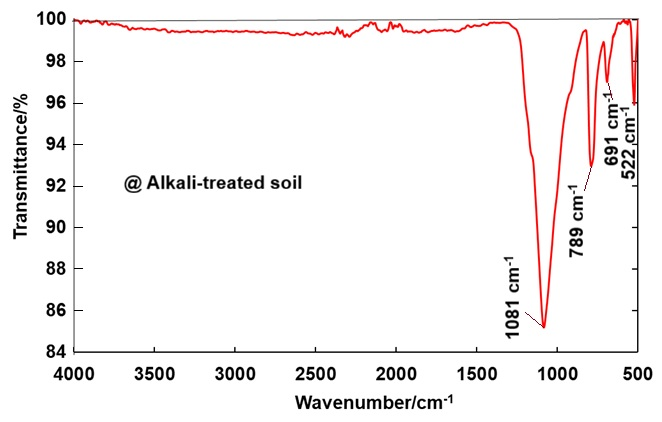


**Fig.S3b** ATR-IR spectrum of alkali-treated soil.


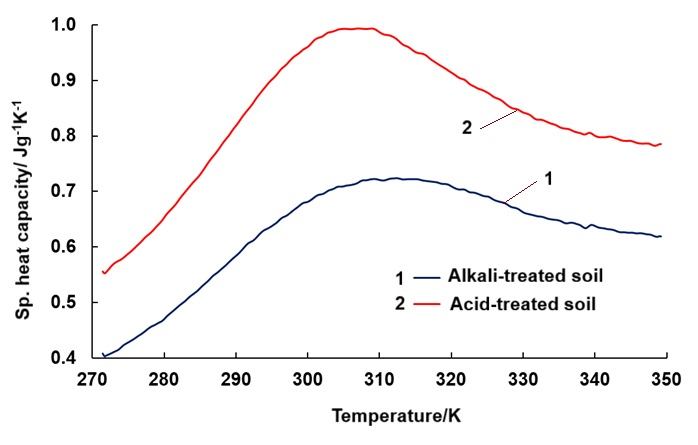


**Fig.S4** Specific heat capacity of the chemically treated soil.


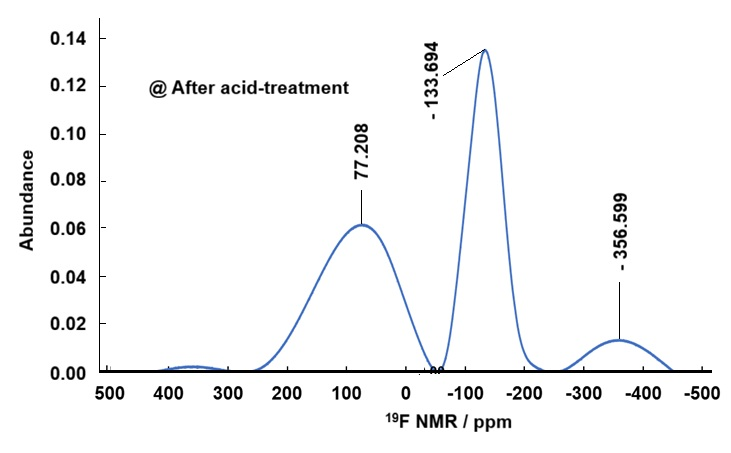


**Fig.S5a** 19F NMR of the acid-treated soil.


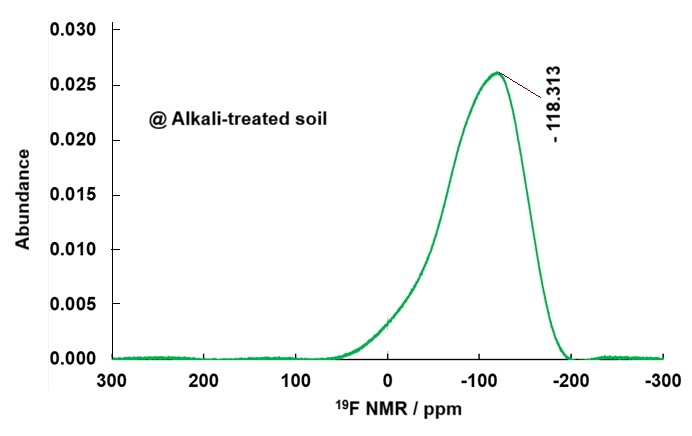


**Fig.S5b** 19F NMR of the alkali-treated soil.


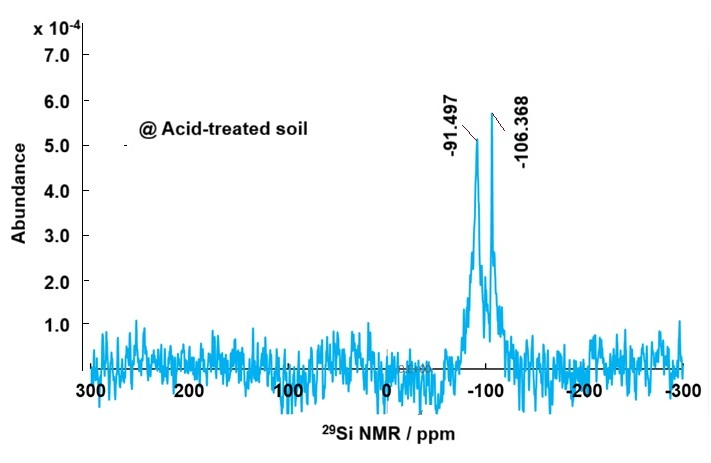


**Fig.S5c** 29Si NMR of the acid-treated soil.


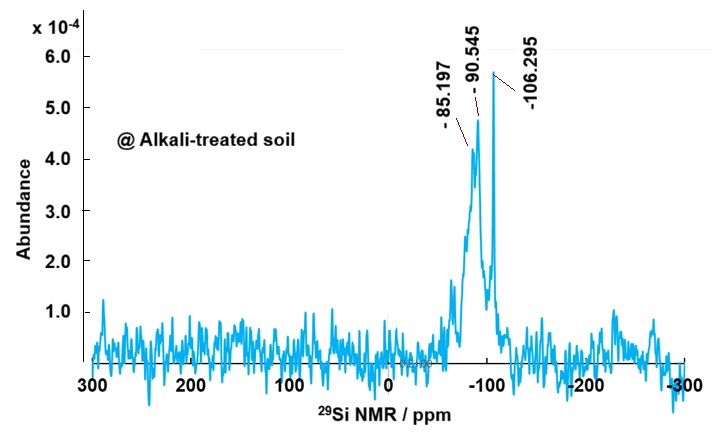


**Fig.S5d** 29Si NMR of the alkali-treated soil.


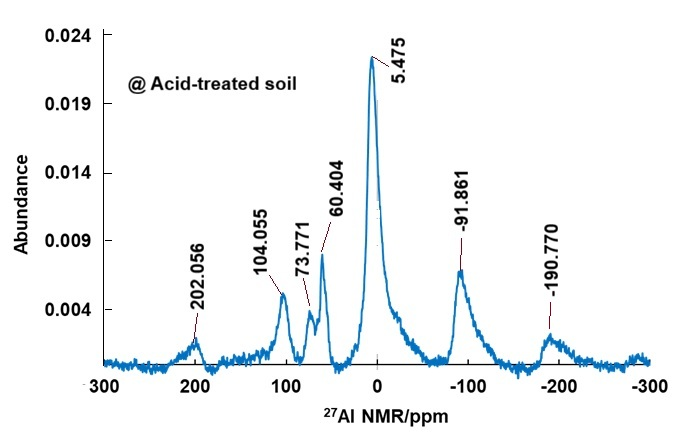


**Fig.S5e** 27Al NMR of the acid-treated soil.


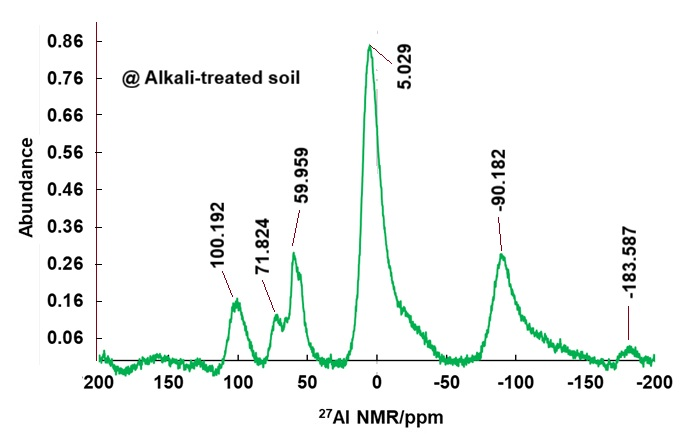


**Fig.S5f** 27Al NMR of the alkali-treated soil.
